# Supplementary material for: In vitro gastrointestinal digestion and fecal fermentation of Pleurotus eryngii proteins extracted using different methods: insights for the utilization of edible mushroom-based proteins as novel nutritional and functional components
Source: Royal Society of Chemistry journal article supplement (doi:10.1039/d4fo02604g), 2024-01-01
Supplement: d4fo02604g2.pdf [file d4fo02604g2.pdf]

Table S1 Simulated Digestive Solution Preparation (1.25 ×)

| Solution                                          | Concentration (g/L) | Additive amount (mL) |            |            |
|---------------------------------------------------|---------------------|----------------------|------------|------------|
|                                                   |                     | SSF (pH 7)           | SGF (pH 3) | SIF (pH 7) |
| KCl                                               | 37.3                | 15.1                 | 6.9        | 6.8        |
| KH <sub>2</sub> PO <sub>4</sub>                   | 68                  | 3.7                  | 0.9        | 0.8        |
| NaHCO <sub>3</sub>                                | 84                  | 6.8                  | 12.5       | 42.5       |
| NaCl                                              | 117                 | -                    | 11.8       | 9.6        |
| MgCl <sub>2</sub> (H <sub>2</sub> O) <sub>6</sub> | 30.5                | 0.5                  | 0.4        | 1.1        |
| (NH <sub>4</sub> ) <sub>2</sub> CO <sub>3</sub>   | 48                  | 0.06                 | 0.5        | -          |
| HCl (pH adjust)                                   | -                   | -                    | -          | -          |
| The following add before use                      |                     |                      |            |            |
| CaCl <sub>2</sub> (H <sub>2</sub> O) <sub>2</sub> | 44.1                | 0.025                | 0.005      | 0.04       |

Table S2 Protein and reducing polysaccharides contents

|     | Protein (g/100g DM)       | Reducing polysaccharides (g/100g DM) |
|-----|---------------------------|--------------------------------------|
| AA  | 48.56 ± 0.70 <sup>a</sup> | 8.89 ± 0.88 <sup>b</sup>             |
| UAA | 46.76 ± 0.34 <sup>b</sup> | 15.44 ± 1.10 <sup>a</sup>            |
| S   | 17.51 ± 0.07 <sup>d</sup> | 4.14 ± 0.54 <sup>c</sup>             |
| CAA | 26.76 ± 0.37 <sup>c</sup> | 10.65 ± 0.19 <sup>b</sup>            |
