# Supplementary figures and images for: In vitro gastrointestinal digestion and fecal fermentation of Pleurotus eryngii proteins extracted using different methods: insights for the utilization of edible mushroom-based proteins as novel nutritional and functional components
Source: Royal Society of Chemistry journal article supplement (doi:10.1039/d4fo02604g), 2024-01-01

Figure S1 (A) NMDS; (B)PCoA

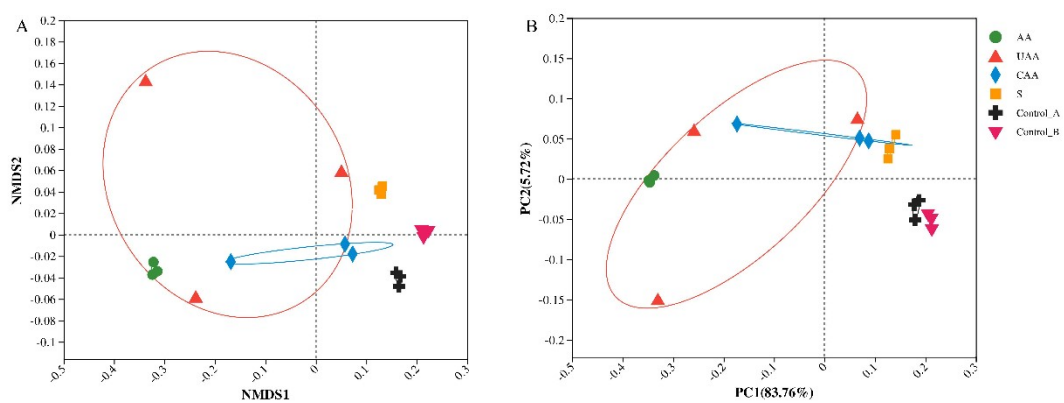

Figure S2 Hierarchical clustering tree on genus level

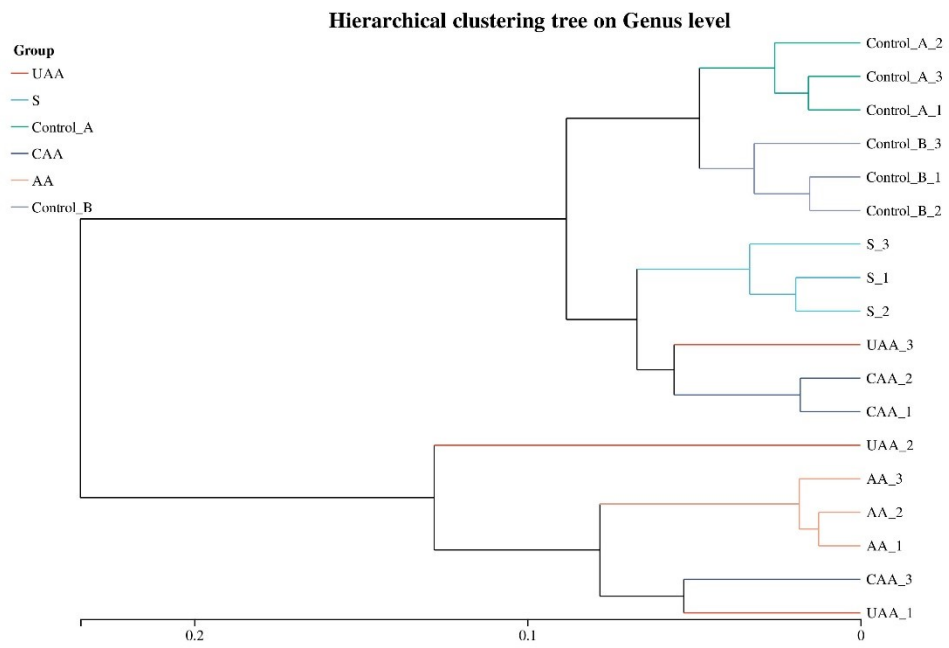

Supplement: d4fo02604g1.pdf [file d4fo02604g1.pdf]
